# Supplementary material for: Analysis of 7,815 cancer exomes reveals associations between mutational processes and somatic driver mutations
Source: PLoS Genet. 2018 Nov 9;14(11):e1007779. doi: 10.1371/journal.pgen.1007779 (PMC6249022; doi:10.1371/journal.pgen.1007779)
Supplement: S2 Table — (XLSX) [file pgen.1007779.s002.xlsx]

## Sheet: Table S2
Table S2 - Driver mutations analysed in this study, curated as described in Methods and Fig S1.
Gene	Mutation (Gene)	Mutation (Protein)	Coordinates (GRCh38)	Trinucleotide context
AKT1	c.49G>A	p.E17K	chr14:104780214	T[C>T]C
APC	c.4348C>T	p.R1450*	chr5:112839942	G[C>T]G
APC	c.2626C>T	p.R876*	chr5:112838220	G[C>T]G
APC	c.646C>T	p.R216*	chr5:112792446	G[C>T]G
ARID1A	c.5965C>T	p.R1989*	chr1:26779863	T[C>T]G
BCOR	c.4376A>G	p.N1459S	chrX:40062191	A[T>C]T
BRAF	c.1799T>A	p.V600E	chr7:140753336	G[T>A]G
BRAF	c.1798G>A	p.V600M	chr7:140753337	A[C>T]T
EGFR	c.1793G>T	p.G598V	chr7:55165350	T[C>A]C
EGFR	c.866C>T	p.A289V	chr7:55154129	G[C>T]C
EGFR	c.2573T>G	p.L858R	chr7:55191822	C[T>G]G
ERBB2	c.929C>T	p.S310F	chr17:39711955	T[C>T]C
FBXW7	c.1394G>A	p.R465H	chr4:152328232	A[C>T]G
FGFR2	c.755C>G	p.S252W	chr10:121520163	T[C>G]G
FGFR3	c.746C>G	p.S249C	chr4:1801841	T[C>G]C
IDH1	c.394C>T	p.R132C	chr2:208248389	T[C>T]G
IDH1	c.395G>A	p.R132H	chr2:208248388	A[C>T]G
KRAS	c.34G>T	p.G12C	chr12:25245351	C[C>A]A
KRAS	c.35G>T	p.G12V	chr12:25245350	A[C>A]C
KRAS	c.35G>A	p.G12D	chr12:25245350	A[C>T]C
KRAS	c.35G>C	p.G12A	chr12:25245350	A[C>G]C
KRAS	c.34G>C	p.G12R	chr12:25245351	C[C>G]A
KRAS	c.34G>A	p.G12S	chr12:25245351	C[C>T]A
KRAS	c.38G>A	p.G13D	chr12:25245347	G[C>T]C
MAP2K1	c.370C>T	p.P124S	chr15:66436824	T[C>T]C
NRAS	c.181C>A	p.Q61K	chr1:114713909	A[C>A]A
NRAS	c.182A>T	p.Q61L	chr1:114713908	T[T>A]G
NRAS	c.182A>G	p.Q61R	chr1:114713908	T[T>C]G
PIK3CA	c.1624G>A	p.E542K	chr3:179218294	T[C>T]A
PIK3CA	c.1633G>A	p.E545K	chr3:179218303	T[C>T]A
PIK3CA	c.263G>A	p.R88Q	chr3:179199088	T[C>T]G
PIK3CA	c.3140A>G	p.H1047R	chr3:179234297	A[T>C]G
POLE	c.857C>G	p.P286R	chr12:132676598	C[C>G]T
PPP2R1A	c.536C>G	p.P179R	chr19:52212718	C[C>G]C
PTEN	c.389G>A	p.R130Q	chr10:87933148	T[C>T]G
PTEN	c.697C>T	p.R233*	chr10:87957915	A[C>T]G
PTEN	c.388C>G	p.R130G	chr10:87933147	A[C>G]G
PTEN	c.388C>T	p.R130*	chr10:87933147	A[C>T]G
RAC1	c.85C>T	p.P29S	chr7:6387261	T[C>T]C
SMAD4	c.1082G>A	p.R361H	chr18:51065549	G[C>T]G
TP53	c.844C>T	p.R282W	chr17:7673776	C[C>T]G
TP53	c.742C>T	p.R248W	chr17:7674221	C[C>T]G
TP53	c.817C>T	p.R273C	chr17:7673803	G[C>T]G
TP53	c.637C>T	p.R213*	chr17:7674894	T[C>T]G
TP53	c.818G>A	p.R273H	chr17:7673802	A[C>T]G
TP53	c.743G>A	p.R248Q	chr17:7674220	C[C>T]G
TP53	c.524G>A	p.R175H	chr17:7675088	G[C>T]G
TP53	c.469G>T	p.V157F	chr17:7675143	A[C>A]G
TP53	c.473G>T	p.R158L	chr17:7675139	G[C>A]G
TP53	c.839G>C	p.R280T	chr17:7673781	T[C>G]T
